# Supplementary material for: Research diversity in accounting doctoral education: survey results from the German-speaking countries
Source: Springer Nature journal article supplement (doi:10.1007/s40685-017-0046-y), 2017-05-04
Supplement: MOESM1 [file 12267086]

**Questionnaire (**excerpt, translated by the authors)[[1]](#footnote-1)

During your PhD studies, what kind of classes have you already attended or do you plan to attend?

- Business economics
- Economics
- Statistics
- Psychology / Behavioural science
- Natural sciences
- Other: __________________________
- I have not attended any classes

What method do you employ in your dissertation?

- Mathematical modelling
- Verbal-analytical
- Empirical
- Other: ___________________________

IF METHOD EMPIRICAL

How do you proceed in your empirical study?

- Case study
- Survey
- Self-created database
- External database
- Experiment
- Other: ___________________________

Where do you see your professional future?

- More in academia
- More in practice
- Yet to be determined

Do you also read English-speaking journals

- Yes
- No

How familiar are you with the following journals?

- Journal of Accounting Research
- The Accounting Review
- Journal of Accounting and Economics
- Accounting, Organizations and Society
- Critical Perspectives on Accounting
- European Accounting Review
- Zeitschrift für betriebswirtschaftliche Forschung
- Zeitschrift für Betriebswirtschaft
- Die Betriebswirtschaft
- Betriebswirtschaftliche Forschung und Praxis
- Journal of Accounting and Institutions

Not familiar at all □□□□□□□ Very familiar (scale for each journal)

If you are very familiar with further academic journals, please provide the names of the journals: _______________________________

How do you rate the following journals in terms of their quality?

- Journal of Accounting Research
- The Accounting Review
- Journal of Accounting and Economics
- Accounting, Organizations and Society
- Critical Perspectives on Accounting
- European Accounting Review
- Zeitschrift für betriebswirtschaftliche Forschung
- Zeitschrift für Betriebswirtschaft
- Die Betriebswirtschaft
- Betriebswirtschaftliche Forschung und Praxis

Very bad quality □□□□□□□ Very high quality □ Can’t say (scale for each journal)

Are you aware of the journal ranking of the VHB (JOURQUAL)?

- Yes
- No

During your PhD, have you been abroad or do you plan to go?

- Yes, research stay
- Yes, conferences and/ or workshops
- No

Which profile best fits the chair at which you are doing your PhD?

- Financial accounting/Auditing
- Management accounting/Controlling
- Tax accounting
- Other: ________________________

How are you going to publish your dissertation?

- Paper-based
- Monograph
- Yet to be determined

**Data collection process**

A manual internet search was used to identify all the chairs related to management accounting or financial accounting/auditing, using the keywords “financial accounting”, “management accounting”, “auditing” and “corporate governance”, at public and private universities in the German-speaking area. We found 150 chairs in autumn 2009. The population of doctoral students, as assessed on October 1st, 2009, consisted of 782 doctoral students mentioned on the websites which was reduced to 762 due to 20 invalid email addresses. In October 2009, we sent an initial invitation to take part in the survey[[2]](#footnote-2) and we reminded those who had not yet participated on three occasions after three weeks had elapsed, respectively. All the participants remained anonymous. In total, 293 doctoral students completed the questionnaire, which amounts to a response rate of 38.45%.

**Coding process**

We used dummy variables to capture whether doctoral students attend courses in statistics (Statcourse), economics (Econcourse) or psychology (Psychcourse).

We distinguish the following research methods: verbal-analytical (Verbal), analytical modelling (Model) and empirical (Empirical). Empirical research is further divided into case studies (Case), surveys (Survey), self-created databases (Selfdb), external databases (Externaldb) and experiments (Experiment). The dataset contains a dummy variable for each of the methods.

Doctoral students’ career preferences are captured by the variable Careerpref which includes the values 1 for academia, 2 for practice and 3 for undecided.

We created a dummy variable based on doctoral students’ answers to the question whether they read English-speaking journals (Englishjournal), which takes on the value of 1 if doctoral students read such journals and 0 otherwise.

The familiarity of doctoral students with the following journals was assessed on a rating scale from 1 (not familiar at all) to 7 (very familiar): Journal of Accounting Research (FamJAR), The Accounting Review (FamTAR), Journal of Accounting and Economics (FamJAE), Accounting, Organizations and Society (FamAOS), Critical Perspectives on Accounting (FamCPA), European Accounting Review (FamEAR), Zeitschrift für betriebswirtschaftliche Forschung (FamZfbF), Zeitschrift für Betriebswirtschaft (FamZfB), Die Betriebswirtschaft (FamDBW), Betriebswirtschaftliche Forschung und Praxis (FamBFuP), Journal of Accounting and Institutions (FamJAI).

The quality perceptions of journals were assessed on a rating scale from 1 (very bad quality) to 7 (very high quality): Journal of Accounting Research (QualJAR), The Accounting Review (QualTAR), Journal of Accounting and Economics (QualJAE), Accounting, Organizations and Society (QualAOS), Critical Perspectives on Accounting (QualCPA), European Accounting Review (QualEAR), Zeitschrift für betriebswirtschaftliche Forschung (QualZfbF), Zeitschrift für Betriebswirtschaft (QualZfB), Die Betriebswirtschaft (QualDBW), Betriebswirtschaftliche Forschung und Praxis (QualBFuP).

We used dummy variables to capture whether doctoral students are aware of the JOURQUAL ranking (AwareJQ), whether they attend conferences/workshops abroad (Confabroad) and whether they have completed or planned research stays abroad (Stayabroad). The variable capturing the publication form of the dissertation (Publformdiss) takes on a value of 1 if the dissertation is paper-based, 2 if it is a monograph and 3 if the doctoral student is still undecided.

The variable Specialisation captures whether doctoral students stated to be mainly related to management accounting (value: 1), financial accounting (value: 2) or another specialisation including tax accounting (value: 3).

1. The order of questions follows the original sequence in the actual questionnaire. [↑](#footnote-ref-1)
2. The questionnaire, in total, included about 60 questions concerned with a wide range of topics e.g. related to working conditions, supervision, career plans, research attitudes and interests, the conditions in which the respondents’ research is done and its outcome. [↑](#footnote-ref-2)
